# Supplementary material for: Seasonality of water quality and diarrheal disease counts in urban and rural settings in south India
Source: PubMed Central journal article supplement (PMC4751522; doi:10.1038/srep20521), 2016-02-12
Supplement: srep20521-s1.pdf [file srep20521-s1.pdf]

## **SUPPLEMENTAL MATERIAL**

### **Seasonality of water quality and diarrheal disease counts in urban and rural settings in south India**

Alexandra V. Kulinkina, Venkat Raghava Mohan, Mark R. Francis, Deepthi Kattula, Rajiv Sarkar, Jeanine D. Plummer, Honorine Ward, Gagandeep Kang, Vinohar Balraj, Elena N. Naumova

Table S1: Spearman's correlation coefficients for weekly aggregated meteorological and private domain water quality parameters used as predictors in the diarrheal disease count models. Urban site correlations are shown in the top and rural site on the bottom portions of the matrix.

|                    | Temp  | Rain ( $\log_e$ ) | pH    | $\text{NO}_3^-$ | TDS   | TC ( $\log_{10}$ ) | FC ( $\log_{10}$ ) |
|--------------------|-------|-------------------|-------|-----------------|-------|--------------------|--------------------|
| Temp               | ---   | 0.04              | 0.48* | -0.20           | 0.80* | -0.49*             | 0.40*              |
| Rain ( $\log_e$ )  | 0.07  | ---               | 0.13  | 0.30            | 0.24  | -0.25              | -0.25              |
| pH                 | 0.33* | -0.07             | ---   | -0.05           | 0.68* | -0.30              | 0.27               |
| $\text{NO}_3^-$    | -0.34 | 0.18              | -0.19 | ---             | -0.12 | 0.37*              | 0.07               |
| TDS                | 0.02  | 0.05              | 0.15  | -0.28           | ---   | -0.47*             | 0.39*              |
| TC ( $\log_{10}$ ) | 0.00  | 0.18              | 0.07  | 0.14            | 0.14  | ---                | 0.18               |
| FC ( $\log_{10}$ ) | 0.44* | -0.09             | 0.05  | -0.16           | -0.02 | 0.20               | ---                |

\* Indicates statistical significance at  $\alpha < 0.05$  level

Table S2: Results of water quality regression models 1A, 2A and 3A

|                             | pH                   |                       | NO <sub>3</sub> <sup>-</sup> (ppm) |                      | TDS (ppm)            |                      | TC (log <sub>10</sub> ) (CFU/100 mL) |                     | FC (log <sub>10</sub> ) (CFU/100 mL) |                      |
|-----------------------------|----------------------|-----------------------|------------------------------------|----------------------|----------------------|----------------------|--------------------------------------|---------------------|--------------------------------------|----------------------|
|                             | Urban                | Rural                 | Urban                              | Rural                | Urban                | Rural                | Urban                                | Rural               | Urban                                | Rural                |
| <b>MODEL 1A<sup>#</sup></b> |                      |                       |                                    |                      |                      |                      |                                      |                     |                                      |                      |
| <b>PUBLIC</b>               | [26]                 | [20]                  | [41]                               | [54]                 | [31]                 | [5]                  | [20]                                 | [18]                | [7]                                  | [19]                 |
| Intercept                   | 8.727***<br>(0.429)  | 7.178***<br>(0.064)   | 17.14***<br>(3.295)                | 19.67***<br>(0.532)  | 901.2***<br>(104.6)  | 864.9***<br>(24.62)  | 5.993***<br>(0.569)                  | 2.780***<br>(0.079) | 5.128***<br>(0.674)                  | 1.589***<br>(0.099)  |
| Week                        | -0.022*<br>(0.010)   | 0.008***<br>(0.001)   | 0.004<br>(0.077)                   | -0.068***<br>(0.009) | -0.392<br>(2.430)    | -0.191<br>(0.414)    | -0.071***<br>(0.013)                 | 0.006***<br>(0.001) | -0.071***<br>(0.016)                 | 0.010***<br>(0.002)  |
| TS1                         | 0.305*<br>(0.122)    | 0.236***<br>(0.064)   | -0.584<br>(0.940)                  | -0.933<br>(0.535)    | -31.79<br>(29.85)    | -142.2***<br>(24.77) | 1.091***<br>(0.162)                  | 0.196*<br>(0.079)   | 0.572**<br>(0.190)                   | -0.309**<br>(0.099)  |
| TS2                         | 0.468*<br>(0.191)    | 0.166**<br>(0.060)    | 6.905***<br>(1.465)                | 6.343***<br>(0.498)  | -72.65<br>(46.52)    | -93.80***<br>(23.10) | 1.701***<br>(0.253)                  | 0.495***<br>(0.074) | 1.051***<br>(0.297)                  | -0.132<br>(0.093)    |
| TS3                         | -0.026<br>(0.259)    | -0.130<br>(0.072)     | 3.617<br>(1.990)                   | 11.57***<br>(0.601)  | -185.7**<br>(63.18)  | -110.8***<br>(27.83) | 2.443***<br>(0.344)                  | 0.479***<br>(0.089) | 1.762***<br>(0.404)                  | -0.196<br>(0.111)    |
| TS4                         | 0.846*<br>(0.339)    | -0.169**<br>(0.057)   | -1.390<br>(2.606)                  | 1.882***<br>(0.472)  | -156.9<br>(82.74)    | -85.64***<br>(21.85) | 2.887***<br>(0.450)                  | 0.292***<br>(0.070) | 2.129***<br>(0.530)                  | -0.737***<br>(0.088) |
| TS5                         | -0.047<br>(0.127)    | 0.326***<br>(0.061)   | -1.279<br>(0.975)                  | -1.593**<br>(0.504)  | -148.6***<br>(30.97) | -113.7***<br>(23.34) | -0.536**<br>(0.168)                  | 0.086<br>(0.075)    | -0.918***<br>(0.200)                 | -0.146<br>(0.094)    |
| <b>PRIVATE</b>              | [43]                 | [17]                  | [35]                               | [62]                 | [44]                 | [19]                 | [10]                                 | [1]                 | [11]                                 | [11]                 |
| Intercept                   | 7.321***<br>(0.075)  | 7.269***<br>(0.082)   | 22.06***<br>(0.554)                | 19.86***<br>(0.546)  | 853.3***<br>(15.94)  | 987.6***<br>(31.97)  | 3.819***<br>(0.086)                  | 3.675***<br>(0.096) | 2.739***<br>(0.127)                  | 3.045***<br>(0.144)  |
| Week                        | 0.019***<br>(0.001)  | 0.0073***<br>(0.001)  | -0.129***<br>(0.010)               | -0.070***<br>(0.007) | 0.864**<br>(0.290)   | 0.469<br>(0.434)     | -0.007***<br>(0.002)                 | -0.005<br>(0.001)   | 0.000<br>(0.002)                     | -0.004*<br>(0.002)   |
| TS1                         | -0.323***<br>(0.071) | 0.0971<br>(0.083)     | 1.707**<br>(0.520)                 | -0.341<br>(0.552)    | -31.58*<br>(14.95)   | -260.0***<br>(32.27) | 0.179*<br>(0.081)                    | 0.018<br>(0.097)    | -0.747***<br>(0.119)                 | -0.646***<br>(0.145) |
| TS2                         | -0.558***<br>(0.075) | 0.0536<br>(0.095)     | 8.212***<br>(0.553)                | 9.641***<br>(0.631)  | -139.0***<br>(15.91) | -335.0***<br>(36.92) | 0.353***<br>(0.086)                  | 0.059<br>(0.111)    | -0.368**<br>(0.127)                  | -0.553***<br>(0.166) |
| TS3                         | -1.243***<br>(0.076) | -0.2484**<br>(0.088)  | 6.731***<br>(0.555)                | 9.471***<br>(0.581)  | -199.0***<br>(15.95) | -278.1***<br>(34.00) | 0.351***<br>(0.087)                  | -0.075<br>(0.103)   | -0.602***<br>(0.127)                 | -0.979***<br>(0.153) |
| TS4                         | -0.721***<br>(0.058) | -0.3257***<br>(0.080) | 1.739***<br>(0.427)                | 3.158***<br>(0.529)  | -220.5***<br>(12.28) | -334.7***<br>(30.95) | 0.385***<br>(0.067)                  | -0.096<br>(0.093)   | -0.674***<br>(0.098)                 | -0.835***<br>(0.139) |
| TS5                         | -0.149<br>(0.083)    | 0.0352<br>(0.084)     | -1.045<br>(0.613)                  | -1.122*<br>(0.559)   | -48.84**<br>(17.61)  | -298.2***<br>(32.73) | -0.053<br>(0.096)                    | -0.144<br>(0.099)   | -0.084<br>(0.140)                    | -0.527***<br>(0.147) |
| <b>MODEL 2A</b>             |                      |                       |                                    |                      |                      |                      |                                      |                     |                                      |                      |
| <b>PUBLIC</b>               | [22]                 | [19]                  | [47]                               | [63]                 | [33]                 | [2]                  | [17]                                 | [20]                | [0]                                  | [17]                 |
| Intercept                   | 7.242***<br>(0.186)  | 7.191***<br>(0.061)   | 18.13***<br>(1.323)                | 24.22***<br>(0.449)  | 664.6***<br>(43.64)  | 758.0***<br>(23.75)  | 3.596***<br>(0.246)                  | 3.021***<br>(0.074) | 2.289***<br>(0.298)                  | 1.215***<br>(0.094)  |
| Week                        | 0.011**<br>(0.004)   | 0.009***<br>(0.001)   | 0.006<br>(0.025)                   | -0.099***<br>(0.008) | 2.217**<br>(0.819)   | 0.133<br>(0.439)     | -0.005<br>(0.005)                    | 0.006***<br>(0.001) | -0.005<br>(0.006)                    | 0.012***<br>(0.002)  |
| Sin (2π)                    | -0.382***<br>(0.068) | -0.135***<br>(0.028)  | 3.042***<br>(0.487)                | 6.389***<br>(0.209)  | -92.22***<br>(16.05) | -30.12**<br>(11.05)  | 0.401***<br>(0.091)                  | 0.240***<br>(0.034) | 0.087<br>(0.109)                     | -0.138**<br>(0.044)  |
| Cos (2π)                    | 0.081*<br>(0.036)    | 0.151***<br>(0.022)   | 0.887***<br>(0.257)                | 0.126<br>(0.162)     | 90.61***<br>(8.475)  | -0.687<br>(8.544)    | -0.099*<br>(0.048)                   | 0.040<br>(0.026)    | -0.009<br>(0.057)                    | 0.204***<br>(0.034)  |
| Sin (4π)                    | 0.275***<br>(0.048)  | 0.185***<br>(0.024)   | 1.292***<br>(0.344)                | -0.769***<br>(0.177) | 21.31<br>(11.36)     | -0.156<br>(9.359)    | -0.012<br>(0.064)                    | 0.104***<br>(0.029) | -0.047<br>(0.076)                    | 0.196***<br>(0.037)  |
| Cos (4π)                    | 0.157***<br>(0.036)  | 0.054*<br>(0.022)     | -2.630***<br>(0.257)               | -2.674***<br>(0.166) | -14.85<br>(8.476)    | -10.03<br>(8.761)    | 0.179***<br>(0.048)                  | 0.091***<br>(0.027) | 0.012<br>(0.058)                     | -0.125***<br>(0.035) |

| <b>PRIVATE</b>            | [41]                 | [21]                 | [46]                 | [68]                 | [43]                 | [6]                  | [11]                 | [2]                 | [11]                 | [10]                 |
|---------------------------|----------------------|----------------------|----------------------|----------------------|----------------------|----------------------|----------------------|---------------------|----------------------|----------------------|
| Intercept                 | 6.899***<br>(0.070)  | 7.289***<br>(0.060)  | 25.85***<br>(0.460)  | 21.02***<br>(0.372)  | 739.0***<br>(14.53)  | 728.3***<br>(25.48)  | 4.041***<br>(0.078)  | 3.669***<br>(0.071) | 2.266***<br>(0.114)  | 2.515***<br>(0.107)  |
| Week                      | 0.018***<br>(0.001)  | 0.006***<br>(0.001)  | -0.150***<br>(0.009) | -0.038***<br>(0.007) | 0.995***<br>(0.289)  | 0.335<br>(0.467)     | -0.007***<br>(0.002) | -0.001<br>(0.001)   | 0.002<br>(0.002)     | -0.006**<br>(0.002)  |
| Sin (2 $\pi$ )            | -0.482***<br>(0.036) | -0.070*<br>(0.032)   | 5.071***<br>(0.241)  | 5.099***<br>(0.198)  | -82.40***<br>(7.598) | -55.73***<br>(13.55) | 0.196***<br>(0.041)  | 0.059<br>(0.034)    | -0.319***<br>(0.060) | -0.217***<br>(0.057) |
| Cos (2 $\pi$ )            | 0.201***<br>(0.030)  | 0.161***<br>(0.028)  | 1.062***<br>(0.201)  | 0.202<br>(0.174)     | 76.56***<br>(6.339)  | 35.71**<br>(11.90)   | -0.081*<br>(0.034)   | 0.055<br>(0.033)    | -0.058<br>(0.050)    | 0.109*<br>(0.050)    |
| Sin (4 $\pi$ )            | 0.167***<br>(0.035)  | 0.192***<br>(0.031)  | 0.431<br>(0.229)     | -0.396*<br>(0.196)   | 17.92*<br>(7.228)    | -13.21<br>(13.41)    | 0.044<br>(0.039)     | 0.086*<br>(0.038)   | 0.172**<br>(0.057)   | 0.139*<br>(0.056)    |
| Cos (4 $\pi$ )            | 0.050<br>(0.027)     | 0.058<br>(0.030)     | -1.506***<br>(0.177) | -3.055***<br>(0.189) | -15.49**<br>(5.594)  | -39.53**<br>(12.92)  | 0.067*<br>(0.030)    | 0.065<br>(0.036)    | -0.233***<br>(0.044) | -0.068<br>(0.054)    |
| <b>MODEL 3A</b>           |                      |                      |                      |                      |                      |                      |                      |                     |                      |                      |
| <b>PUBLIC</b>             | [26]                 | [21]                 | [56]                 | [63]                 | [36]                 | [6]                  | [18]                 | [21]                | [2]                  | [19]                 |
| Intercept                 | 10.44***<br>(0.904)  | 9.219***<br>(0.504)  | -15.69**<br>(5.994)  | 24.42***<br>(3.765)  | 190.8<br>(211.2)     | 1819***<br>(194.6)   | 4.550***<br>(1.218)  | 3.587***<br>(0.613) | -0.008<br>(1.474)    | 2.249**<br>(0.780)   |
| Week                      | 0.008*<br>(0.004)    | 0.009***<br>(0.001)  | 0.040<br>(0.023)     | -0.101***<br>(0.008) | 2.721**<br>(0.825)   | 0.155<br>(0.437)     | -0.005<br>(0.005)    | 0.006***<br>(0.001) | -0.003<br>(0.006)    | 0.011***<br>(0.002)  |
| Sin (2 $\pi$ )            | -0.623***<br>(0.094) | -0.309***<br>(0.049) | 3.844***<br>(0.625)  | 6.214***<br>(0.369)  | -89.71***<br>(22.00) | -123.5***<br>(19.07) | 0.372**<br>(0.127)   | 0.150*<br>(0.060)   | 0.345*<br>(0.155)    | -0.289***<br>(0.077) |
| Cos (2 $\pi$ )            | 0.423***<br>(0.101)  | 0.362***<br>(0.061)  | -2.737***<br>(0.670) | -0.001<br>(0.458)    | 39.76<br>(23.60)     | 107.6***<br>(23.65)  | 0.004<br>(0.136)     | 0.060<br>(0.075)    | -0.252<br>(0.165)    | 0.254**<br>(0.095)   |
| Sin (4 $\pi$ )            | 0.265***<br>(0.048)  | 0.205***<br>(0.025)  | 1.415***<br>(0.316)  | -0.684***<br>(0.185) | 23.12*<br>(11.14)    | 11.31<br>(9.555)     | -0.016<br>(0.064)    | 0.131***<br>(0.030) | -0.044<br>(0.076)    | 0.239***<br>(0.038)  |
| Cos (4 $\pi$ )            | 0.009<br>(0.053)     | -0.035<br>(0.039)    | -1.299***<br>(0.353) | -2.589***<br>(0.252) | 2.655<br>(12.45)     | -54.90***<br>(13.04) | 0.140<br>(0.072)     | 0.091*<br>(0.041)   | 0.132<br>(0.088)     | -0.133*<br>(0.052)   |
| Temperature               | -0.108***<br>(0.029) | -0.071***<br>(0.017) | 1.074***<br>(0.195)  | -0.014<br>(0.130)    | 14.73*<br>(6.877)    | -37.28***<br>(6.694) | -0.031<br>(0.040)    | -0.022<br>(0.021)   | 0.080<br>(0.048)     | -0.039<br>(0.027)    |
| Rain (log <sub>10</sub> ) | 0.035<br>(0.042)     | -0.003<br>(0.036)    | 1.823***<br>(0.285)  | 0.419<br>(0.268)     | 36.53***<br>(10.04)  | 4.280<br>(13.88)     | -0.043<br>(0.058)    | 0.110*<br>(0.044)   | -0.126<br>(0.071)    | 0.163**<br>(0.055)   |
| <b>PRIVATE</b>            | [42]                 | [22]                 | [51]                 | [69]                 | [44]                 | [8]                  | [12]                 | [3]                 | [12]                 | [14]                 |
| Intercept                 | 9.494***<br>(0.810)  | 8.107***<br>(0.597)  | 2.636<br>(5.137)     | 16.90***<br>(3.675)  | 537.4**<br>(169.2)   | 1189***<br>(253.9)   | 2.153*<br>(0.913)    | 4.590***<br>(0.715) | -0.493<br>(1.336)    | 6.492***<br>(1.057)  |
| Week                      | 0.017***<br>(0.002)  | 0.006***<br>(0.001)  | -0.159***<br>(0.010) | -0.041***<br>(0.007) | 0.774*<br>(0.323)    | 0.570<br>(0.468)     | -0.005**<br>(0.002)  | -0.001<br>(0.001)   | 0.005*<br>(0.003)    | -0.006**<br>(0.002)  |
| Sin (2 $\pi$ )            | -0.667***<br>(0.078) | -0.157**<br>(0.059)  | 5.840***<br>(0.493)  | 5.679***<br>(0.364)  | -82.52***<br>(16.23) | -105.5***<br>(25.12) | 0.402***<br>(0.088)  | -0.041<br>(0.071)   | -0.016<br>(0.128)    | -0.494***<br>(0.105) |
| Cos (2 $\pi$ )            | 0.490***<br>(0.092)  | 0.209**<br>(0.069)   | -2.074***<br>(0.582) | 0.217<br>(0.424)     | 45.07*<br>(19.18)    | 61.75*<br>(29.25)    | -0.247*<br>(0.104)   | 0.105<br>(0.082)    | -0.299*<br>(0.152)   | 0.614***<br>(0.122)  |
| Sin (4 $\pi$ )            | 0.172***<br>(0.035)  | 0.229***<br>(0.034)  | 0.261<br>(0.219)     | -0.784***<br>(0.210) | 15.48*<br>(7.210)    | 8.065<br>(14.47)     | 0.051<br>(0.039)     | 0.129**<br>(0.041)  | 0.182**<br>(0.057)   | 0.099<br>(0.060)     |
| Cos (4 $\pi$ )            | -0.074<br>(0.046)    | 0.045<br>(0.044)     | -0.234<br>(0.291)    | -3.196***<br>(0.274) | -3.183<br>(9.597)    | -45.93*<br>(18.91)   | 0.144**<br>(0.052)   | 0.053<br>(0.053)    | -0.121*<br>(0.076)   | -0.348***<br>(0.079) |
| Temperature               | -0.087**<br>(0.027)  | -0.031<br>(0.021)    | 0.775***<br>(0.173)  | 0.176<br>(0.128)     | 6.671<br>(5.696)     | -17.68*<br>(8.854)   | 0.064*<br>(0.031)    | -0.035<br>(0.025)   | 0.094*<br>(0.045)    | -0.132***<br>(0.037) |
| Rain (log <sub>10</sub> ) | -0.035<br>(0.042)    | 0.077*<br>(0.039)    | 1.839***<br>(0.266)  | -1.009***<br>(0.242) | 27.82**<br>(8.756)   | 45.06**<br>(16.70)   | -0.099*<br>(0.047)   | 0.092*<br>(0.047)   | -0.150*<br>(0.069)   | -0.296***<br>(0.069) |

# Reference category for Model 1A is TS6 (spring).

Regression coefficient (Standard Error) are presented; statistical significance is indicated by \*\*\*p < 0.001, \*\*p < 0.01, \*p < 0.05. Q-value of the model denoted in brackets.

Table S3: Results of diarrheal disease count regression models 1B, 2B, 3B and 4 with no temporal lags

|                                  | Urban             | Rural             | Combined          |
|----------------------------------|-------------------|-------------------|-------------------|
| <b>MODEL 1B</b>                  | [16]              | [22]              | [18]              |
| Intercept                        | -5.443*** (0.294) | -5.336*** (0.390) | -5.414*** (0.233) |
| Week                             | -0.016*** (0.003) | -0.025*** (0.006) | -0.020*** (0.003) |
| TS1                              | 0.141 (0.355)     | -0.139 (0.476)    | 0.042 (0.284)     |
| TS2                              | 0.327 (0.305)     | 0.092 (0.405)     | 0.259 (0.242)     |
| TS3                              | -0.345 (0.331)    | -0.426 (0.439)    | -0.361 (0.263)    |
| TS4                              | 0.480 (0.295)     | 0.390 (0.384)     | 0.467* (0.233)    |
| TS5                              | 0.382 (0.305)     | -0.352 (0.474)    | 0.236 (0.249)     |
| <b>MODEL 2B</b>                  | [13]              | [20]              | [15]              |
| Intercept                        | -5.196*** (0.159) | -5.293*** (0.257) | -5.219*** (0.135) |
| Week                             | -0.017*** (0.003) | -0.027*** (0.006) | -0.021*** (0.003) |
| Sin (2 $\pi$ )                   | -0.009 (0.118)    | 0.083 (0.183)     | 0.016 (0.098)     |
| Cos (2 $\pi$ )                   | 0.023 (0.106)     | 0.022 (0.164)     | 0.003 (0.089)     |
| Sin (4 $\pi$ )                   | 0.077 (0.106)     | -0.060 (0.168)    | 0.050 (0.089)     |
| Cos (4 $\pi$ )                   | 0.284* (0.111)    | 0.334 (0.173)     | 0.298** (0.093)   |
| <b>MODEL 3B</b>                  | [24]              | [25]              | [19]              |
| Intercept                        | 7.136** (2.509)   | -6.786 (4.063)    | 2.984 (2.103)     |
| Week                             | -0.017*** (0.003) | -0.026*** (0.006) | -0.020*** (0.003) |
| Sin (2 $\pi$ )                   | -0.874*** (0.232) | -0.080 (0.380)    | -0.655*** (0.197) |
| Cos (2 $\pi$ )                   | 1.375*** (0.299)  | -0.276 (0.451)    | 0.846*** (0.246)  |
| Sin (4 $\pi$ )                   | 0.162 (0.110)     | -0.016 (0.173)    | 0.123 (0.093)     |
| Cos (4 $\pi$ )                   | -0.399* (0.178)   | 0.500 (0.268)     | -0.118 (0.146)    |
| Temperature                      | -0.425*** (0.087) | 0.035 (0.141)     | -0.288*** (0.073) |
| Rain (log <sub>10</sub> )        | -0.295 (0.156)    | 0.507* (0.204)    | -0.027 (0.123)    |
| <b>MODEL 4<sup>#</sup></b>       | [37]              | [38]              | [18]              |
| Intercept                        | -11.84 (6.313)    | -2.993 (8.552)    | -3.240 (4.218)    |
| Week                             | 0.023 (0.018)     | -0.016 (0.011)    | -0.011 (0.007)    |
| Sin (2 $\pi$ )                   | -0.052 (0.569)    | -0.237 (0.794)    | -0.057 (0.385)    |
| Cos (2 $\pi$ )                   | -0.359 (0.632)    | -0.539 (0.910)    | 0.300 (0.422)     |
| Sin (4 $\pi$ )                   | 0.045 (0.237)     | 0.254 (0.354)     | -0.170 (0.173)    |
| Cos (4 $\pi$ )                   | -0.441 (0.301)    | 0.890 (0.554)     | -0.396 (0.242)    |
| Temperature                      | -0.068 (0.169)    | 0.007 (0.229)     | -0.180 (0.120)    |
| Rain (log <sub>10</sub> )        | -0.558* (0.272)   | 0.542 (0.347)     | -0.137 (0.168)    |
| Med pH                           | -0.261 (0.407)    | -0.332 (0.672)    | 0.182 (0.259)     |
| Med NO <sub>3</sub> <sup>-</sup> | -0.009 (0.042)    | 0.098 (0.074)     | -0.026 (0.028)    |
| Med TDS                          | 0.008* (0.004)    | 0.002 (0.001)     | 0.001 (0.001)     |
| Med TC (log <sub>10</sub> )      | 1.447* (0.627)    | -1.120 (0.695)    | 0.407 (0.393)     |
| Med FC (log <sub>10</sub> )      | -1.127*** (0.307) | -0.012 (0.362)    | -0.306 (0.174)    |

# Results of version 1 are presented, where only private domain weekly median values are used with no interpolation.

Regression coefficient (Standard Error) are presented; statistical significance is indicated by \*\*\*p < 0.001, \*\*p < 0.01, \*p < 0.05. Q-value of the model is denoted in brackets.
